# Supplementary material for: A cell atlas of adult muscle precursors uncovers early events in fibre‐type divergence in Drosophila
Source: PubMed Central journal article supplement (PMC7534622; doi:10.15252/embr.201949555), 2020-08-19
Supplement: EMBR-21-e49555-s001.pdf [file EMBR-21-e49555-s001.pdf]

# Appendix

## Table of Content

|                                      |          |
|--------------------------------------|----------|
| <b><i>Appendix Figures</i></b> ..... | <b>2</b> |
| Appendix Figure S1 .....             | 2        |
| Appendix Figure S2 .....             | 4        |
| Appendix Figure S3 .....             | 6        |
| Appendix Figure S4 .....             | 7        |
| <b><i>Appendix Tables</i></b> .....  | <b>8</b> |
| Appendix Table S1 .....              | 10       |
| Appendix Table S2 .....              | 11       |
| Appendix Table S3 .....              | 14       |
| Appendix Table S4 .....              | 15       |

## Appendix Figures

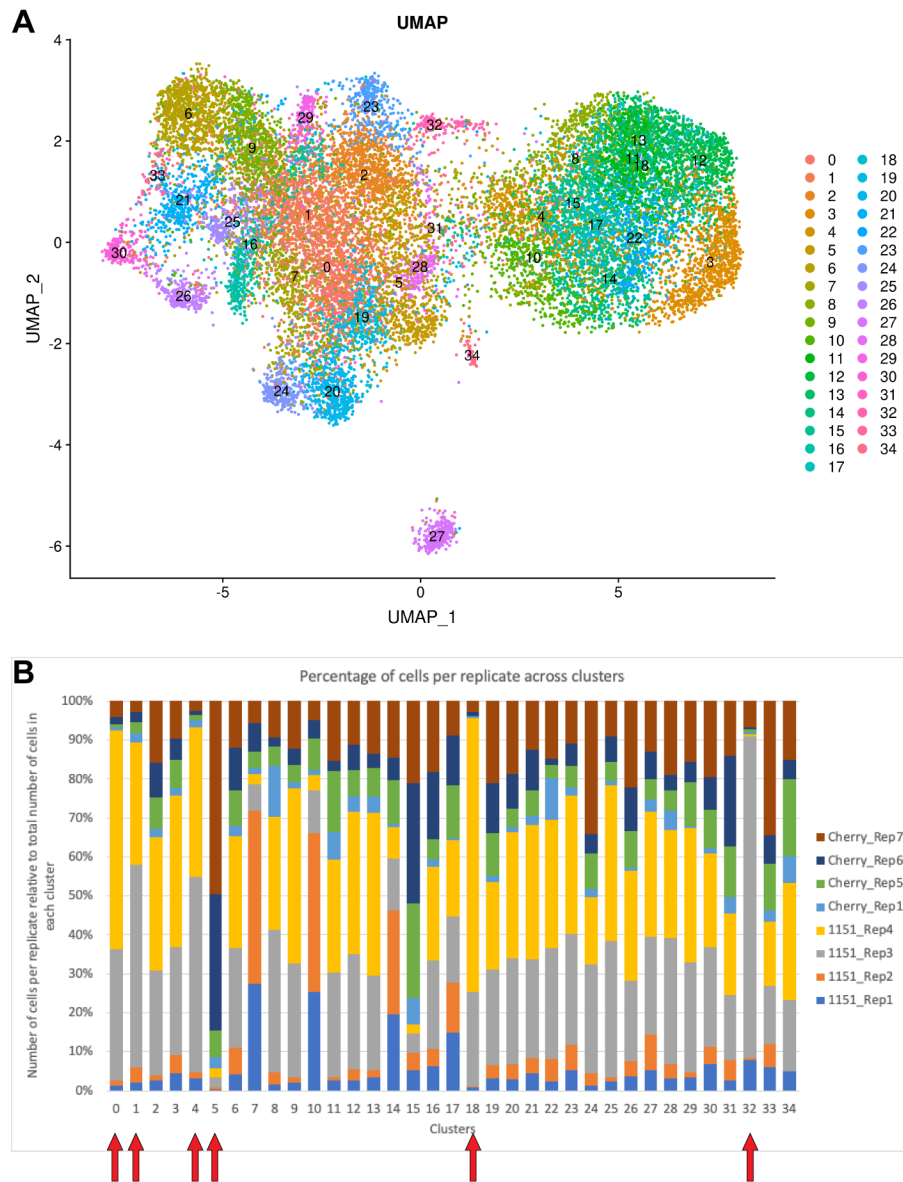

**Appendix Figure S1. Clusters unevenly distributed across replicates.** Related to Figure 1.

A. UMAP plot of the wild type dataset generated from wandering third instar larval wing discs prior to removal of unevenly represented clusters across replicates.

B. Percentage of cells in each replicate across clusters relative to the total number of cells per cluster. Four replicates *1151-GAL4* are indicated as 1151\_Rep1, 1151\_Rep2, 1151\_Rep3, 1151\_Rep4 and four replicates *1151>mCherry-RNAi* as Cherry\_Rep1, Cherry\_Rep5,

Cherry\_Rep6, and Cherry\_Rep7. Red arrows: clusters unevenly represented across replicates that were removed in downstream analysis.

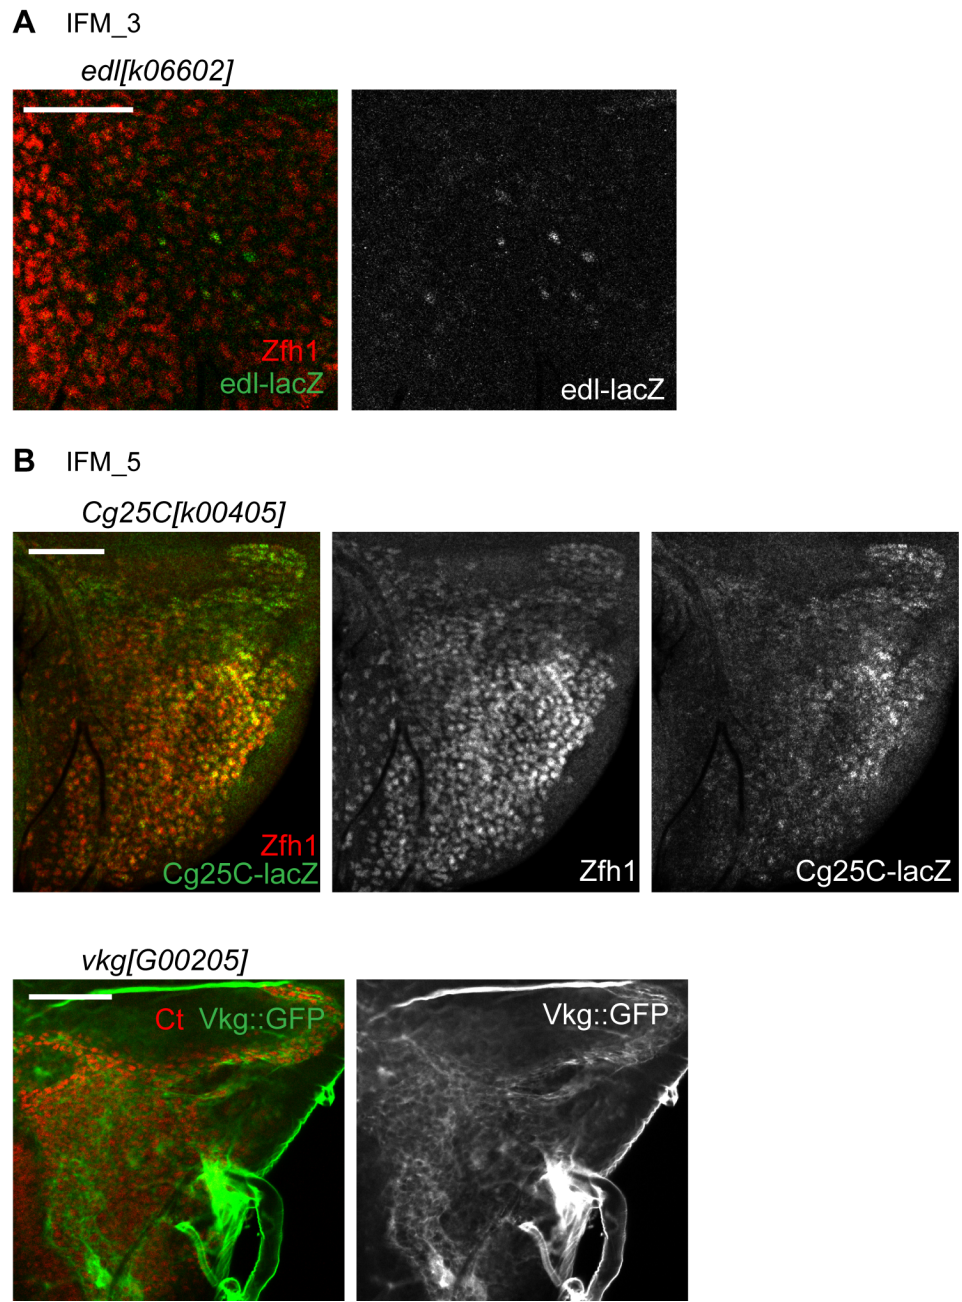

**Appendix Figure S2. Spatial localization over the wing discs of gene markers for IFM clusters.**

Related to Figure 5.

Confocal single plane images of third instar larval wing discs:

A. *edl[k06602]-lacZ* stained with anti- $\beta$ -gal (green) and anti-Zfh1 (red).

B. *Cg25C[k00405]-lacZ* stained with anti- $\beta$ -gal (green) and anti-Zfh1 (red) and *vkg[G00205]-GFP* (green) stained with anti-Ct (red).

Scale bars: 50  $\mu$ m. Full genotypes: (A) *y<sup>-</sup>, w<sup>-</sup>; edl[k06602]; +*, (B) *y<sup>-</sup>, w<sup>-</sup>; Col4a1[k00405]-lacZ; +* and *w<sup>-</sup>; vkg-GFP[G00205];+*.

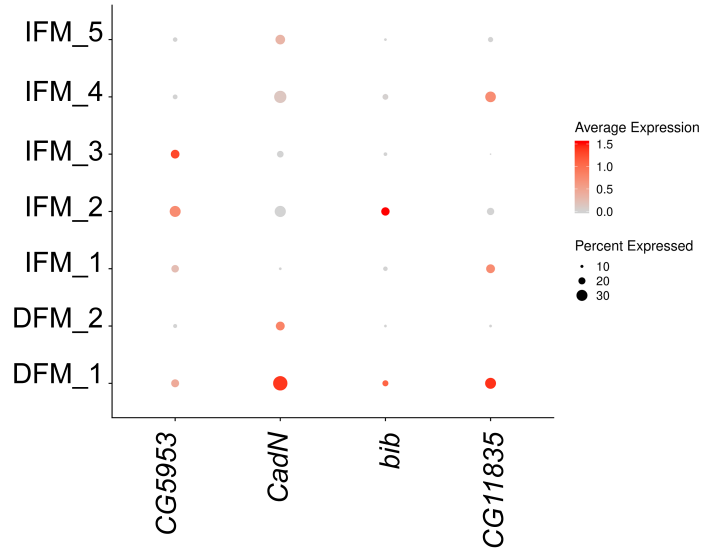

**Appendix Figure S3. Additional gene markers for myoblast clusters.** Related to Figure 6.

Dot plot showing the expression of the differentially expressed genes across myoblast clusters of the reference single cell atlas. Color intensity represents the average normalized expression level. Dot diameter represents the fraction of cells expressing each gene in each cluster.

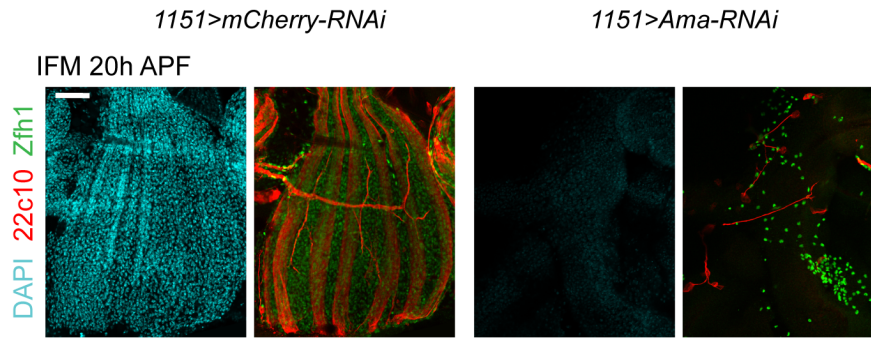

**Appendix Figure S4. Loss of *Ama* in myoblasts blocks myoblast fusion in developing pupa.**

Related to Figure 8.

Confocal single plane images of *1151>mCherry-RNAi* and *1151>Ama-RNAi* forming IFM (DLM) at 20 h APF stained with anti-Zfh1 (green), anti-Futsch/22c10 (red) and DAPI (cyan).

Scale bar: 50  $\mu$ m. Anterior up. Full genotypes: *1151-GAL4; +; UAS-mCherry-RNAi* and *1151-GAL4; +; UAS-Ama[HMS00297]-RNAi*.

## Appendix Tables

| Gene                | RNAi -Stock Number | Lethality         | Flight defect | Insertion              | Source |
|---------------------|--------------------|-------------------|---------------|------------------------|--------|
| <b>Act57B</b>       | 31551              | no                | none          | P{TRiP.JF01113}attP2   | BDSC   |
| <b>Alk</b>          | 27518              | no                | none          | P{TRiP.JF02668}attP2   | BDSC   |
| <b>Ama</b>          | 33416              | yes (early)       | N/A           | P{TRiP.HMS00297}attP2  | BDSC   |
| <b>Ama</b>          | 22944              | yes (mild, early) | N/A           | P{GD12733}v22944       | VDRC   |
| <b>Argk</b>         | 41697              | no                | none          | P{TRiP.HMS02262}attP2  | BDSC   |
| <b>Argk</b>         | 31951              | yes (pharate)     | N/A           | P{TRiP.JF02243}attP2   | BDSC   |
| <b>bib</b>          | 27691              | no                | none          | P{TRiP.JF02771}attP2   | BDSC   |
| <b>CadN</b>         | 41982              | no                | none          | P{TRiP.HMS02380}attP2  | BDSC   |
| <b>CadN</b>         | 27503              | no                | none          | P{TRiP.JF02653}attP2   | BDSC   |
| <b>CG11835</b>      | 41725              | no                | flight defect | P{TRiP.HMS02291}attP2  | BDSC   |
| <b>CG5953</b>       | 57287              | no                | none          | P{TRiP.HMJ21225}attP40 | BDSC   |
| <b>CG5953</b>       | 57543              | no                | none          | P{TRiP.HMC04860}attP40 | BDSC   |
| <b>CG9650</b>       | 58323              | no                | none          | P{TRiP.HMJ22453}attP40 | BDSC   |
| <b>CG9650</b>       | 26713              | no                | none          | P{TRiP.JF02253}attP2   | BDSC   |
| <b>chinmo</b>       | 33638              | yes (early)       | N/A           | P{TRiP.HMS00036}attP2  | BDSC   |
| <b>chinmo</b>       | 31738              | yes (pupa)        | N/A           | P{TRiP.HM04048}attP2   | BDSC   |
| <b>chinmo</b>       | 62873              | yes (early)       | N/A           | P{TRiP.HMC05346}attP40 | BDSC   |
| <b>chinmo</b>       | 26777              | no                | none          | P{TRiP.JF02341}attP2   | BDSC   |
| <b>Col4a1</b>       | 44520              | no                | none          | P{TRiP.HMC02910}attP2  | BDSC   |
| <b>con</b>          | 28967              | no                | none          | P{TRiP.HM05178}attP2   | BDSC   |
| <b>E(spl)m3-HLH</b> | 55302              | no                | none          | P{TRiP.HMC03989}attP2  | BDSC   |



|                              |       |                |                       |                            |      |
|------------------------------|-------|----------------|-----------------------|----------------------------|------|
| <b>E(spl)m3-HLH</b>          | 25977 | no             | none                  | P{TRiP.JF0199<br>9}attP2   | BDSC |
| <b>E(spl)m6-BFM</b>          | 66950 | no             | none                  | P{TRiP.HMS05<br>416}attP40 | BDSC |
| <b>E(spl)m7-HLH</b>          | 29327 | no             | none                  | P{TRiP.JF0248<br>9}attP2   | BDSC |
| <b>E(spl)malpha-<br/>BFM</b> | 66949 | no             | none                  | P{TRiP.HMS05<br>415}attP40 | BDSC |
| <b>E(spl)mdelta-<br/>HLH</b> | 26203 | no             | mild flight<br>defect | P{TRiP.JF0210<br>1}attP2   | BDSC |
| <b>E(spl)mdelta-<br/>HLH</b> | 65129 | no             | none                  | P{TRiP.HMC05<br>943}attP2  | BDSC |
| <b>edl</b>                   | 57552 | no             | none                  | P{TRiP.HMC04<br>869}attP40 | BDSC |
| <b>eEF1alpha2</b>            | 64659 | no             | flight defect         | P{TRiP.HMC05<br>694}attP40 | BDSC |
| <b>h</b>                     | 34326 | no             | none                  | P{TRiP.HMS01<br>313}attP2  | BDSC |
| <b>hoip</b>                  | 21752 | no             | none                  | P{GD11169}v2<br>1752       | VDRC |
| <b>LamC</b>                  | 31621 | yes (early)    | N/A                   | P{TRiP.JF0140<br>6}attP2   | BDSC |
| <b>mamo</b>                  | 60111 | yes (early)    | N/A                   | P{TRiP.HMC05<br>105}attP2  | BDSC |
| <b>mamo</b>                  | 26766 | no             | none                  | P{TRiP.JF0233<br>0}attP2   | BDSC |
| <b>mamo</b>                  | 51770 | no             | mild flight<br>defect | P{TRiP.HMC03<br>325}attP40 | BDSC |
| <b>mid</b>                   | 50681 | no             | none                  | P{TRiP.HMC03<br>082}attP2  | BDSC |
| <b>nkd</b>                   | 67788 | no             | flight defect         | P{TRiP.HMS05<br>702}attP40 | BDSC |
| <b>nop5</b>                  | 55262 | yes (early)    | N/A                   | P{TRiP.HMC03<br>949}attP40 | BDSC |
| <b>Nrt</b>                   | 28742 | no             | none                  | P{TRiP.JF0317<br>0}attP2   | BDSC |
| <b>side</b>                  | 50642 | no             | none                  | P{TRiP.HMC03<br>042}attP2  | BDSC |
| <b>sp1</b>                   | 35777 | no             | mild flight<br>defect | P{TRiP.HMS01<br>526}attP2  | BDSC |
| <b>SPARC</b>                 | 40885 | yes (early)    | N/A                   | P{TRiP.HMS02<br>133}attP40 | BDSC |
| <b>stg</b>                   | 34831 | mild (pharate) | flight defect         | P{TRiP.HMS00<br>146}attP2  | BDSC |
| <b>stg</b>                   | 29556 | no             | none                  | P{TRiP.JF0323<br>5}attP2   | BDSC |

|              |       |             |      |                           |      |
|--------------|-------|-------------|------|---------------------------|------|
| <b>Ten-a</b> | 29439 | no          | none | P{TRiP.JF0337<br>5}attP2  | BDSC |
| <b>vkg</b>   | 50895 | yes (early) | N/A  | P{TRiP.HMC02<br>400}attP2 | BDSC |
| <b>wb</b>    | 29559 | no          | none | P{TRiP.JF0323<br>8}attP2  | BDSC |

**Appendix Table S1. Functional analysis of myoblast markers by screening muscle-related phenotype using *Mef2-GAL4* driver.** Related to Figure 6A-B.

The *UAS-RNAi* lines were crossed to *Mef2-GAL4*. List of stocks and genes used in the screen.

Both viability and flight ability were assessed unless phenotype was lethal.

| Gene          | RNAi -Stock Number | Lethality           | Flight defect | Insertion              | Source |
|---------------|--------------------|---------------------|---------------|------------------------|--------|
| <b>Ama</b>    | 33416              | yes (pharate)       | NA            | P{TRiP.HMS00297}attP2  | BDSC   |
| <b>SPARC</b>  | 40885              | no                  | none          | P{TRiP.HMS02133}attP40 | BDSC   |
| <b>chinmo</b> | 33638              | yes (pharate)       | NA            | P{TRiP.HMS00036}attP2  | BDSC   |
| <b>chinmo</b> | 31738              | Yes (mild, pharate) | NA            | P{TRiP.HM04048}attP2   | BDSC   |
| <b>chinmo</b> | 62873              | no                  | NA            | P{TRiP.HMC05346}attP40 | BDSC   |
| <b>nop5</b>   | 55262              | yes (pharate)       | N/A           | P{TRiP.HMC03949}attP40 | BDSC   |
| <b>mamo</b>   | 60111              | yes (early)         | N/A           | P{TRiP.HMC05105}attP2  | BDSC   |
| <b>LamC</b>   | 31621              | no                  | none          | P{TRiP.JF01406}attP2   | BDSC   |
| <b>vkg</b>    | 50895              | no                  | none          | P{TRiP.HMC02400}attP2  | BDSC   |

**Appendix Table S2. Functional analysis of myoblast markers by screening muscle-related phenotype using *1151-GAL4* driver.** Related to Figure 6C-D.

The *UAS-RNAi* lines were crossed to *1151-GAL4* drivers if cross to *Mef2-GAL4* showed early lethality. List of stocks and genes used in the screen. Both viability and flight ability were assessed unless phenotype was lethal.

| Gene                             | Stock  | Type                                   | Source                                     | Insertion                                                               |
|----------------------------------|--------|----------------------------------------|--------------------------------------------|-------------------------------------------------------------------------|
| <b>UAS-G-TRACE</b>               |        | cell lineage system                    | Evans et al 2019, Nat Methods              | P{UAS-RedStinger} 4, P{UAS-FLP1.D}JD1, pUbi-63E-STOP-Stinger insert 9F6 |
| <b>UAS-Ama<sup>OE</sup> (II)</b> |        | Overexpression (UAS-cDNA)              | This work                                  | UAS-Ama-FLAG-HA (DGRC 1621050)                                          |
|                                  | 9723   | PhiC31 integrase-mediated transgenesis | BDSC                                       | PBac{y[+]-attP-3B}VK00002                                               |
| <b>1151</b>                      |        | GAL4                                   | Cripps                                     |                                                                         |
| <b>Mef2</b>                      | 27390  | GAL4                                   | BDSC                                       | P{GAL4-Mef2.R}3                                                         |
|                                  |        |                                        |                                            |                                                                         |
| <b>Ama</b>                       | 103970 | GAL4                                   | KYOTO Stock Center (DGRC)                  | P{GawB}Ama[NP1297]                                                      |
| <b>SPARC</b>                     | 77473  | GAL4                                   | BDSC                                       | Mi{GT-GAL4}SPARC[MI00329-GAL4]                                          |
| <b>E(spl)m3-HLH</b>              | 46517  | GAL4                                   | BDSC-Janelia                               | P{GMR10E12-GAL4}attP2                                                   |
| <b>E(spl)m6-BFM</b>              |        | GAL4                                   | Jagla (Aradhya et al. eLife 2015;4:e08497) | m6gap-GAL4                                                              |
| <b>E(spl)m6-BFM</b>              |        | GFP reporter                           | Jagla (Aradhya et al. eLife 2015;4:e08497) | m6gapGFP                                                                |
| <b>E(spl)m7-HLH</b>              | 55839  | GFP tag                                | BDSC                                       | PBac{E(spl)m7-HLH-GFP.FPTB}VK00037                                      |
| <b>E(spl)mbeta-HLH</b>           | 65294  | GFP tag                                | BDSC                                       | E(spl)mbeta-HLH-GFP.FPTB}attP40                                         |
| <b>grh</b>                       | 42272  | GFP tag                                | BDSC                                       | PBac{grh-GFP.FPTB}VK00033                                               |
| <b>vkg</b>                       | 110692 | GFP tag                                | KYOTO Stock Center (DGRC)                  | vkg-GFP{PTT-un1}G00454                                                  |
| <b>vkg</b>                       | 110626 | GFP tag                                | KYOTO Stock Center (DGRC)                  | vkg-GFP{PTT-un1}G00205                                                  |
| <b>Argk</b>                      | 51522  | GFP trap                               | BDSC                                       | P{PTT-GB}Argk[CB03789]                                                  |
| <b>nkd</b>                       | 30664  | GFP trap                               | BDSC                                       | Mi{MIC}nkd[MI00209]                                                     |
| <b>Ten-a</b>                     | 60541  | GFP trap                               | BDSC                                       | Mi{PT-GFSTF.2}Ten-a[MI04411-GFSTF.2]                                    |
| <b>Col4a1/Cg25C</b>              | 499    | lacZ                                   | BDSC                                       | P{IArB}Col4a1[A109.1F2]                                                 |
| <b>Col4a1/Cg25C</b>              | 10479  | lacZ                                   | BDSC                                       | P{lacW}Col4a1[k00405]                                                   |
| <b>Dad</b>                       | 10305  | lacZ                                   | BDSC                                       | P{w[+mC]=lacW}Dad[j1E4]                                                 |
| <b>dpp</b>                       | 12379  | lacZ                                   | BDSC                                       | P{ry[+t7.2]=PZ}dpp[10638]                                               |
| <b>edl</b>                       | 10633  | lacZ                                   | BDSC                                       | P{lacW}edl[k06602]                                                      |

|                         |        |          |                           |                              |
|-------------------------|--------|----------|---------------------------|------------------------------|
| <b>edl</b>              | 102845 | lacZ     | KYOTO Stock Center (DGRC) | P{lacW}edl[k12907]           |
| <b>twi</b>              |        | lacZ     | Cripps                    |                              |
| <b>kirre</b>            | rp298  | nlacZ    | Cripps                    |                              |
| <b>UAS-GFP</b>          |        | Reporter | Frolov                    | P{UAS-nGFP}2                 |
| <b>UAS-mCD8::GFP</b>    | 32185  | Reporter | BDSC                      | P{10XUAS-IVS-mCD8::GFP}attP2 |
| <b>UAS-mCD8.ChRFP</b>   | 27392  | Reporter | BDSC                      | P{UAS-mCD8.ChRFP}3           |
| <b>UAS-myrRFP</b>       | 7118   | Reporter | BDSC                      | P{UAS-myr-mRFP}1             |
| <b>Act57B</b>           | 31551  | RNAi     | BDSC                      | P{TRiP.JF01113}attP2         |
| <b>Alk</b>              | 27518  | RNAi     | BDSC                      | P{TRiP.JF02668}attP2         |
| <b>Ama</b>              | 33416  | RNAi     | BDSC                      | P{TRiP.HMS00297}attP2        |
| <b>Ama</b>              | 22944  | RNAi     | VDRC                      | P{GD12733}v22944             |
| <b>Argk</b>             | 41697  | RNAi     | BDSC                      | P{TRiP.HMS02262}attP2        |
| <b>Argk</b>             | 31951  | RNAi     | BDSC                      | P{TRiP.JF02243}attP2         |
| <b>bib</b>              | 27691  | RNAi     | BDSC                      | P{TRiP.JF02771}attP2         |
| <b>CadN</b>             | 41982  | RNAi     | BDSC                      | P{TRiP.HMS02380}attP2        |
| <b>CadN</b>             | 27503  | RNAi     | BDSC                      | P{TRiP.JF02653}attP2         |
| <b>CG11835</b>          | 41725  | RNAi     | BDSC                      | P{TRiP.HMS02291}attP2        |
| <b>CG5953</b>           | 57287  | RNAi     | BDSC                      | P{TRiP.HMJ21225}attP40       |
| <b>CG5953</b>           | 57543  | RNAi     | BDSC                      | P{TRiP.HMC04860}attP40       |
| <b>CG9650</b>           | 58323  | RNAi     | BDSC                      | P{TRiP.HMJ22453}attP40       |
| <b>CG9650</b>           | 26713  | RNAi     | BDSC                      | P{TRiP.JF02253}attP2         |
| <b>chinmo</b>           | 33638  | RNAi     | BDSC                      | P{TRiP.HMS00036}attP2        |
| <b>chinmo</b>           | 31738  | RNAi     | BDSC                      | P{TRiP.HM04048}attP2         |
| <b>chinmo</b>           | 62873  | RNAi     | BDSC                      | P{TRiP.HMC05346}attP40       |
| <b>chinmo</b>           | 26777  | RNAi     | BDSC                      | P{TRiP.JF02341}attP2         |
| <b>Col4a1/Cg25C</b>     | 44520  | RNAi     | BDSC                      | P{TRiP.HMC02910}attP2        |
| <b>Con</b>              | 28967  | RNAi     | BDSC                      | P{TRiP.HM05178}attP2         |
| <b>E(spl)m3-HLH</b>     | 55302  | RNAi     | BDSC                      | P{TRiP.HMC03989}attP2        |
| <b>E(spl)m3-HLH</b>     | 25977  | RNAi     | BDSC                      | P{TRiP.JF01999}attP2         |
| <b>E(spl)m6-BFM</b>     | 66950  | RNAi     | BDSC                      | P{TRiP.HMS05416}attP40       |
| <b>E(spl)m7-HLH</b>     | 29327  | RNAi     | BDSC                      | P{TRiP.JF02489}attP2         |
| <b>E(spl)malpha-BFM</b> | 66949  | RNAi     | BDSC                      | P{TRiP.HMS05415}attP40       |
| <b>E(spl)mdelta-HLH</b> | 26203  | RNAi     | BDSC                      | P{TRiP.JF02101}attP2         |
| <b>E(spl)mdelta-HLH</b> | 65129  | RNAi     | BDSC                      | P{TRiP.HMC05943}attP2        |
| <b>edl</b>              | 57552  | RNAi     | BDSC                      | P{TRiP.HMC04869}attP40       |

|                   |       |                  |      |                                |
|-------------------|-------|------------------|------|--------------------------------|
| <b>eEF1alpha2</b> | 64659 | RNAi             | BDSC | P{TRiP.HMC05694}attP40         |
| <b>EGFP</b>       | 41559 | RNAi             | BDSC | P{VALIUM20-EGFP.shRNA.3}attP40 |
| <b>h</b>          | 34326 | RNAi             | BDSC | P{TRiP.HMS01313}attP2          |
| <b>hoip</b>       | 21752 | RNAi             | VDRC | P{GD11169}v21752               |
| <b>LamC</b>       | 31621 | RNAi             | BDSC | P{TRiP.JF01406}attP2           |
| <b>mamo</b>       | 26766 | RNAi             | BDSC | P{TRiP.JF02330}attP2           |
| <b>mamo</b>       | 60111 | RNAi             | BDSC | P{TRiP.HMC05105}attP2          |
| <b>mamo</b>       | 51770 | RNAi             | BDSC | P{TRiP.HMC03325}attP40         |
| <b>mCherry</b>    | 35785 | RNAi             | BDSC | P{VALIUM20-mCherry}attP2       |
| <b>mid</b>        | 50681 | RNAi             | BDSC | P{TRiP.HMC03082}attP2          |
| <b>nkd</b>        | 67788 | RNAi             | BDSC | P{TRiP.HMS05702}attP40         |
| <b>nop5</b>       | 55262 | RNAi             | BDSC | P{TRiP.HMC03949}attP40         |
| <b>Nrt</b>        | 28742 | RNAi             | BDSC | P{TRiP.JF03170}attP2           |
| <b>side</b>       | 50642 | RNAi             | BDSC | P{TRiP.HMC03042}attP2          |
| <b>sp1</b>        | 35777 | RNAi             | BDSC | P{TRiP.HMS01526}attP2          |
| <b>SPARC</b>      | 40885 | RNAi             | BDSC | P{TRiP.HMS02133}attP40         |
| <b>stg</b>        | 34831 | RNAi             | BDSC | P{TRiP.HMS00146}attP2          |
| <b>stg</b>        | 29556 | RNAi             | BDSC | P{TRiP.JF03235}attP2           |
| <b>Ten-a</b>      | 29439 | RNAi             | BDSC | P{TRiP.JF03375}attP2           |
| <b>vkg</b>        | 50895 | RNAi             | BDSC | P{TRiP.HMC02400}attP2          |
| <b>wb</b>         | 29559 | RNAi             | BDSC | P{TRiP.JF03238}attP2           |
| <b>attP2</b>      | 36303 | wildtype/control | BDSC | P{CaryP}attP2                  |

**Appendix Table S3. List of fly stocks used in this work.**

| Ab/dye                                                  | host species | identifier  | source                                              | dilution |
|---------------------------------------------------------|--------------|-------------|-----------------------------------------------------|----------|
| Anti-cut                                                | mouse IgG1   | 2B10        | DSHB                                                | 1/50     |
| Anti-GFP (FITC)                                         | goat         | ab6662      | abcam                                               | 1/500    |
| Anti-beta-gal                                           | mouse IgG1   | 40-1a       | DSHB                                                | 1/200    |
| Anti-Zfh1                                               | rabbit       |             | Ruth Lehmann (NYU Langone Medical Center, New York) | 1/1000   |
| Anti-Kettin                                             | rat IgG1     | MAC155      | Babraham Institute                                  | 1/1000   |
| Anti-mCherry 594                                        | rat IgG2a    | M11240      | Life Technologies Corporation                       | 1/750    |
| Anti-beta-PS-integrin                                   | mouse IgG2b  | CF.6G11     | DSHB                                                | 1/50     |
| Anti-futsch                                             | mouse IgG1   | 22C10       | DSHB                                                | 1/30     |
| Anti-Neurotactin                                        | mouse IgG2a  | BP 106      | DSHB                                                | 1/100    |
| Anti-Lamin C                                            | mouse IgG1   | LC28.26-s   | DSHB                                                | 1/100    |
| Anti-Fasciclin III                                      | rabbit       | 7G10        | DSHB                                                | 1/100    |
| Anti-Hairy                                              | mouse        | 1279        | T. Orenic, UIC                                      | 1/4      |
| Anti-wingless                                           | mouse        | 4D4         | DSHB                                                | 1/50     |
| Anti-seven up                                           | mouse        | 5B11        | DSHB                                                | 1/20     |
| Anti-Notch Intracellular domain (NICD)                  | mouse        | C17.9C6     | DSHB                                                | 1/100    |
| Anti- Notch Extracellular domain (NECD)                 | mouse        | 458.2H      | DSHB                                                | 1/100    |
| Anti-Phospho-Histone H3                                 | rabbit       | 06-570      | Millipore                                           | 1/200    |
| Anti-Cleaved Drosophila Dcp-1                           | rabbit       | Asp216      | Cell Signaling Technology                           | 1/500    |
| Phalloidin-TRITC                                        |              | P1951       | Sigma                                               | 1/1000   |
| Phalloidin-Atto 488                                     |              | 49409       | Sigma                                               | 1/1000   |
| 4',6-Diamidino-2-phenylindole dihydrochloride (DAPI)    |              | D8417       | Sigma                                               | 1/1000   |
| Cy™3 AffiniPure Donkey Anti-Mouse IgG (H+L)             | donkey       | 715-165-151 | Jackson Immunoresearch Laboratories                 | 1/300    |
| Alexa Fluor® 647 AffiniPure Donkey Anti-Mouse IgG (H+L) | donkey       | 715-605-151 | Jackson Immunoresearch Laboratories                 | 1/300    |
| Cy™5 AffiniPure Donkey Anti-Rabbit IgG (H+L)            | donkey       | 711-175-152 | Jackson Immunoresearch Laboratories                 | 1/300    |
| Cy3-AffiniPure Donkey Anti-Rabbit IgG (H+L)             | donkey       | 711-165-152 | Jackson Immunoresearch Laboratories                 | 1/300    |
| Alexa Fluor® 647 AffiniPure Donkey Anti-Rat IgG (H+L)   | donkey       | 712-605-153 | Jackson Immunoresearch Laboratories                 | 1/300    |
| Cy™3 AffiniPure Donkey Anti-Rat IgG (H+L)               | donkey       | 712-165-153 | Jackson Immunoresearch Laboratories                 | 1/300    |

**Appendix Table S4. List of antibodies and dyes used in this work.**
